# Supplementary material for: Third Molar Agenesis Is Associated with Facial Size
Source: MDPI journal article supplement (doi:10.3390/biology10070650), 2021-07-12
Supplement: s1 [file s1]

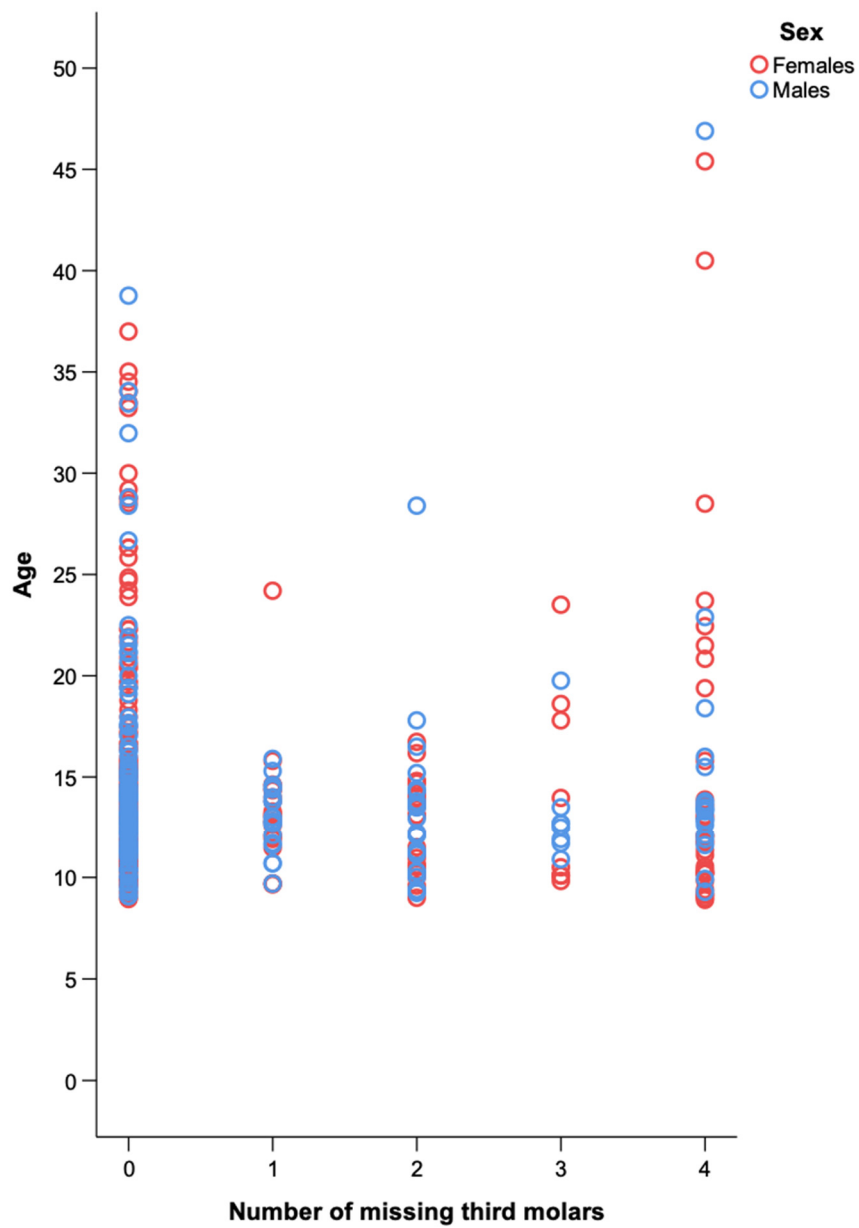

Figure S1. Sample distribution according to age, sex and number of missing third molars.

a.) Entire cranial configuration

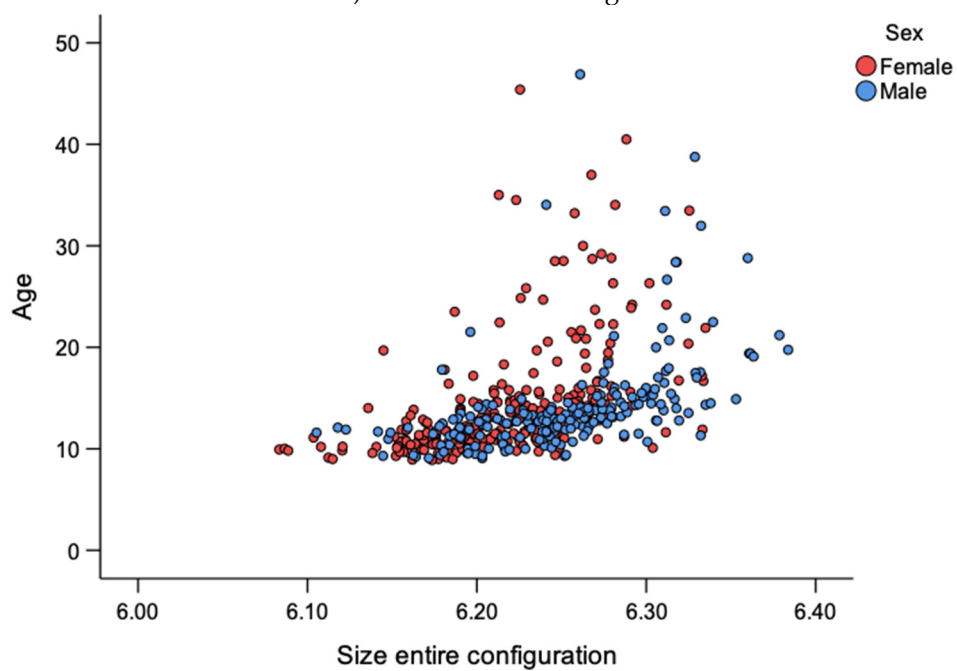

b.) Cranial base

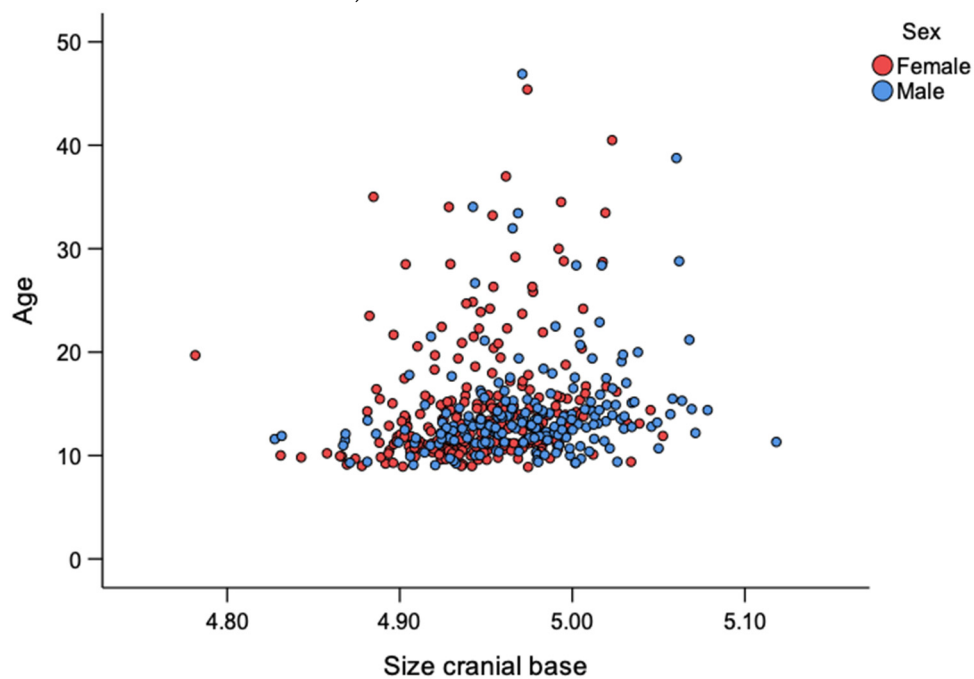

c.) Mandible

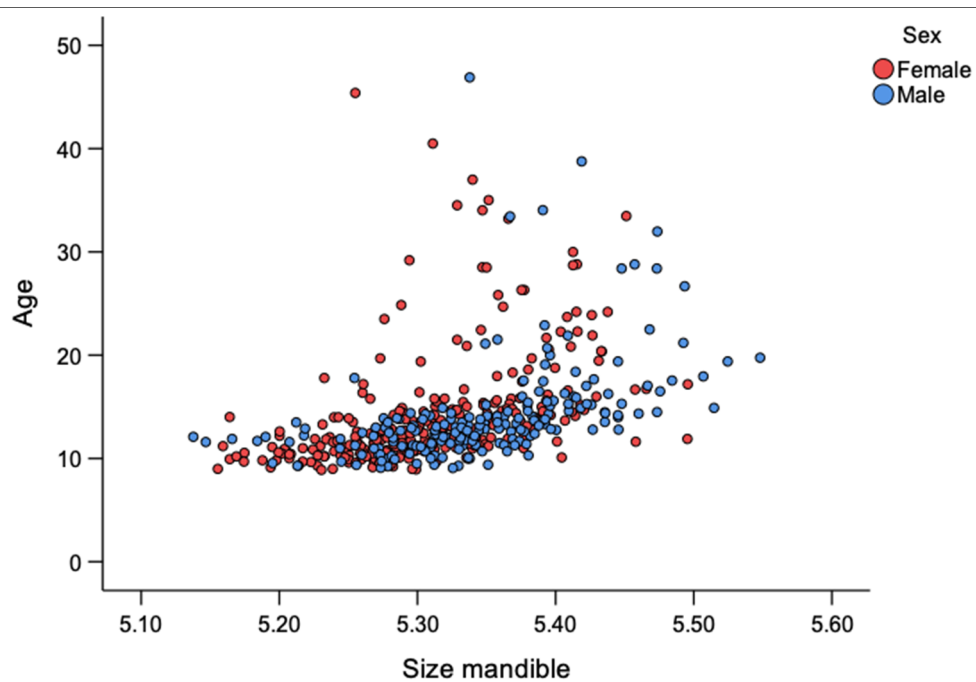

d.) Maxilla

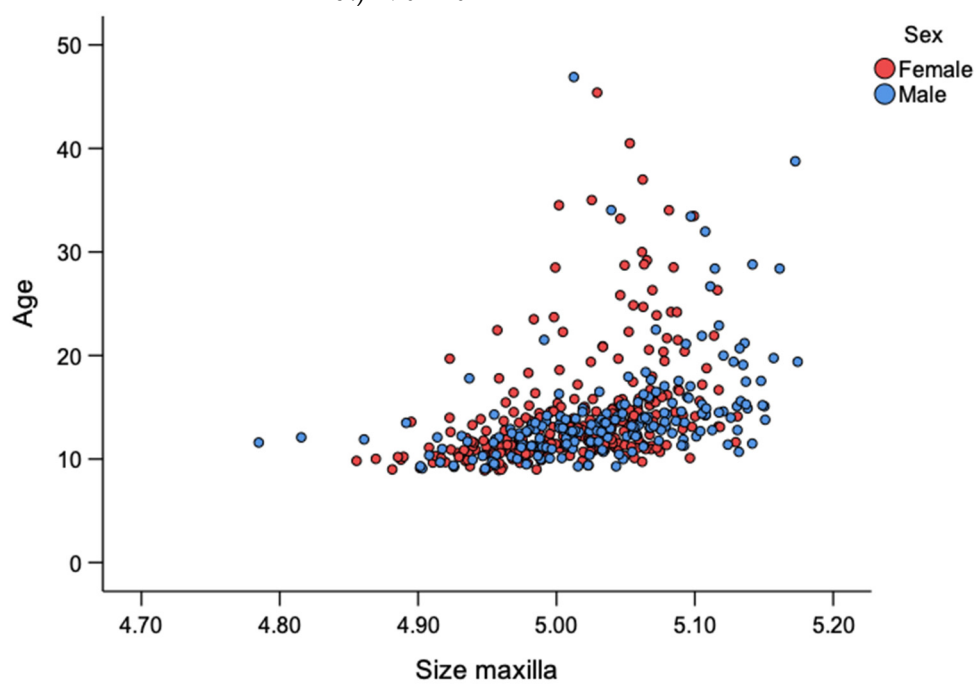

Figure S2: Scatterplots displaying size variability according to age.

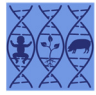

a.) Entire cranial configuration

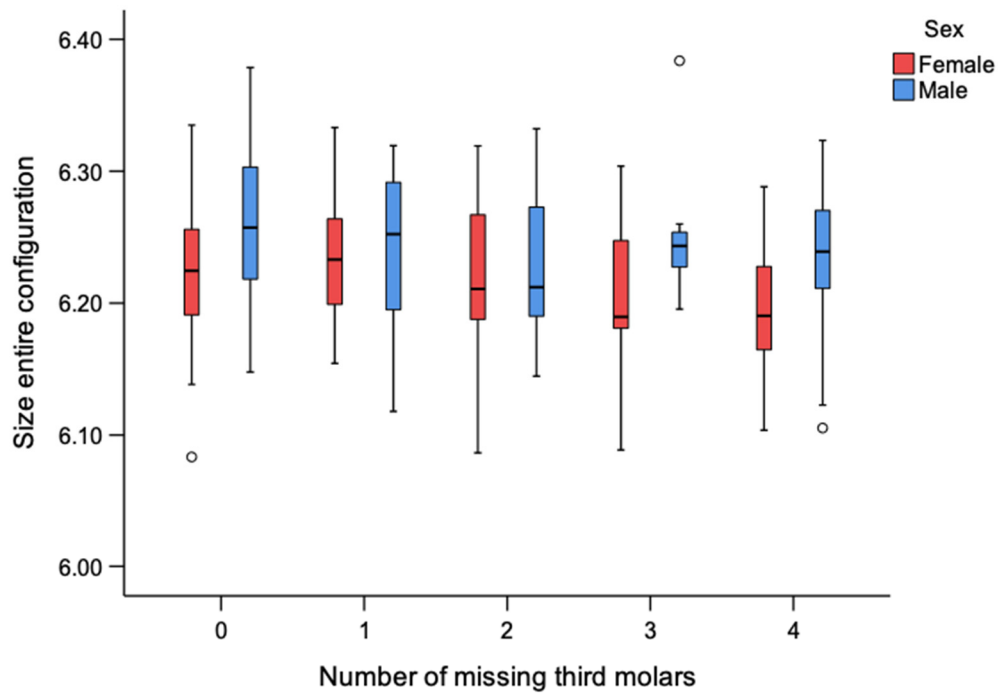

b.) Cranial Base

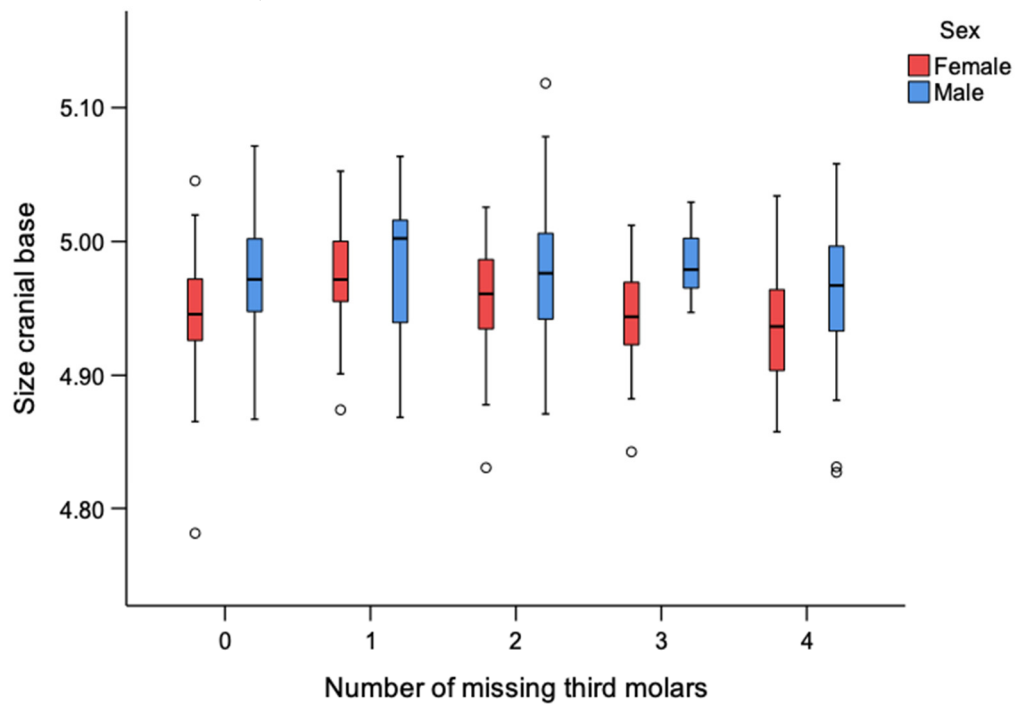

c.) Mandible

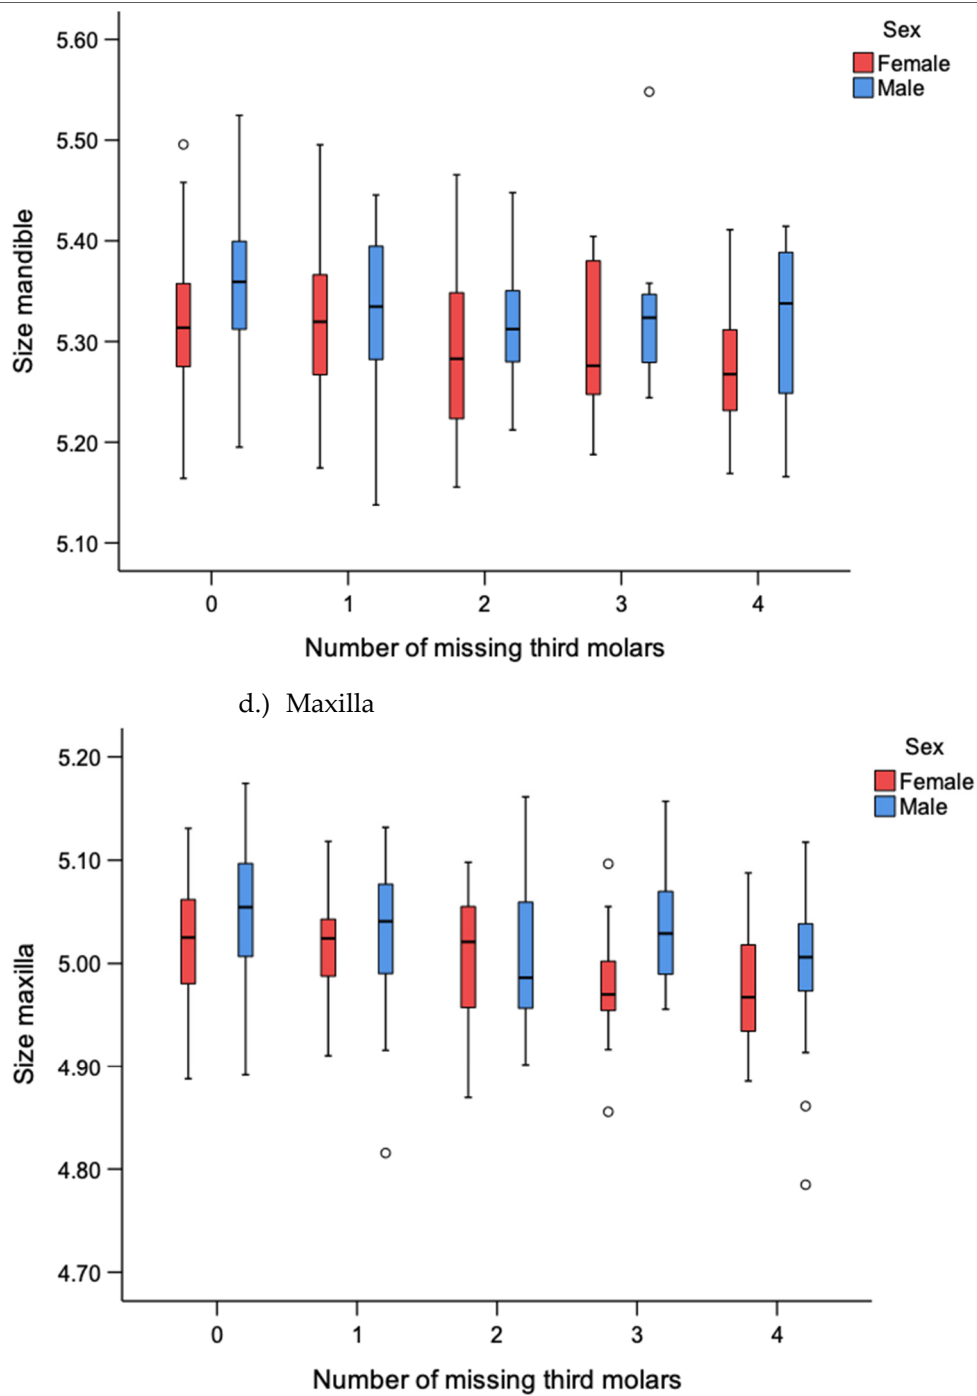

Figure S3: Box Plots showing size variability organized by number of missing third molars.
